# Supplementary material
Source: publisher site journal article supplement (https://www.spandidos-publications.com/3005/downloadSupplementary)
Supplement: Supplementary file 1 [file downloadSupplementary]

Table SI. Clinicopathological characteristics of patients with oral tongue squamous cell carcinoma form the GSE13601 dataset.

| Variable                    | n          | %    |
|-----------------------------|------------|------|
| Median age, years (range)   | 57 (36-97) |      |
| Total number                | 37         | 100  |
| Sex, n (%)                  |            |      |
| Male                        | 22         | 59.5 |
| Female                      | 15         | 40.5 |
| Therapy prior to surgery    |            |      |
| No                          | 22         | 59.5 |
| Yes                         | 15         | 40.5 |
| Smoking history             |            |      |
| No                          | 18         | 48.6 |
| Yes                         | 19         | 51.4 |
| Alcohol history             |            |      |
| No                          | 23         | 62.1 |
| Yes                         | 14         | 37.9 |
| Histological grading        |            |      |
| Well differentiated         | 6          | 16.2 |
| Moderately differentiated   | 24         | 64.9 |
| Poorly differentiated       | 7          | 18.9 |
| Tumor-Node-Metastasis stage |            |      |
| I                           | 8          | 21.6 |
| II                          | 12         | 32.4 |
| III                         | 3          | 8.1  |
| IV                          | 14         | 37.9 |
| Lymph node involvement      |            |      |
| Negative                    | 26         | 70.2 |
| Positive                    | 11         | 29.8 |
